# Supplementary material
Source: PubMed Central journal article supplement (PMC4096127)
Supplement: NIHMS445004-supplement-01.pdf [file NIHMS445004-supplement-01.pdf]

## Supplementary Data

**Supplementary Table 1.** Obatoclax induces apoptosis in primary CD34 (+) AML samples. 7 primary samples were treated with increasing concentrations of obatoclax, and % specific apoptosis was calculated as described in the Materials and Methods.

| <b>OBX concentration</b>     | <b>Average %CD34+AnnexinV+ (specific apoptosis)</b> | <b>SEM</b> |
|------------------------------|-----------------------------------------------------|------------|
| <b>250 nM</b>                | <b>16.0</b>                                         | <b>4.8</b> |
| <b>500 nM</b>                | <b>23.1</b>                                         | <b>5.3</b> |
| <b>1 <math>\mu</math>M</b>   | <b>35.9</b>                                         | <b>8.6</b> |
| <b>2.5 <math>\mu</math>M</b> | <b>48.1</b>                                         | <b>9.4</b> |
| <b>5 <math>\mu</math>M</b>   | <b>62.5</b>                                         | <b>8.8</b> |
| <b>10 <math>\mu</math>M</b>  | <b>73.5</b>                                         | <b>8.4</b> |

**Supplementary Table 2.** – Various concentrations at a fixed ratio of 1:1 of obatoclax and AraC were added to OCI-AML3 cells, HL-60 cells (0.1µM, 0.25µM, 0.5µM, 1µM, 2.5µM), or blast cells from 4 primary AML samples (0.5µM, 1µM, 2.5µM) for 48 h, and CI values for attaining Annexin V – positivity were calculated as described in Materials and Methods. The averaged combination index (CI) values were calculated from the ED<sub>50</sub>, ED<sub>75</sub> and ED<sub>90</sub>.

| Cell line              | Drugs    |          |          | CI values for % annexinV (+) |              |              |                         |
|------------------------|----------|----------|----------|------------------------------|--------------|--------------|-------------------------|
|                        | OBX      | AraC     | ABT-737  | ED50                         | ED75         | ED90         | Average CI value (±SEM) |
| <b>OCI-AML3</b>        | <b>X</b> | <b>X</b> |          | <b>0.44</b>                  | <b>0.35</b>  | <b>0.30</b>  | <b>0.36±0.04</b>        |
| <b>HL60</b>            | <b>X</b> | <b>X</b> |          | <b>0.12</b>                  | <b>0.048</b> | <b>0.018</b> | <b>0.062±0.030</b>      |
| <b>Primary AML #11</b> | <b>X</b> | <b>X</b> |          | <b>0.96</b>                  | <b>0.66</b>  | <b>0.45</b>  | <b>0.69±0.18</b>        |
| <b>Primary AML #12</b> | <b>X</b> | <b>X</b> |          | <b>0.74</b>                  | <b>0.31</b>  | <b>0.14</b>  | <b>0.40±0.22</b>        |
| <b>Primary AML #13</b> | <b>X</b> | <b>X</b> |          | <b>0.87</b>                  | <b>0.30</b>  | <b>0.13</b>  | <b>0.43±0.27</b>        |
| <b>Primary AML #14</b> | <b>X</b> | <b>X</b> |          | <b>0.54</b>                  | <b>0.30</b>  | <b>0.18</b>  | <b>0.34±0.13</b>        |
| <b>OCI-AML3</b>        | <b>x</b> |          | <b>X</b> | <b>0.35</b>                  | <b>0.30</b>  | <b>0.25</b>  | <b>0.30±0.03</b>        |
